# Supplementary material
Source: MDPI journal article supplement (https://www.mdpi.com/1999-4907/12/7/869)
Supplement: s1 [file s1]

## Supplementary Figures

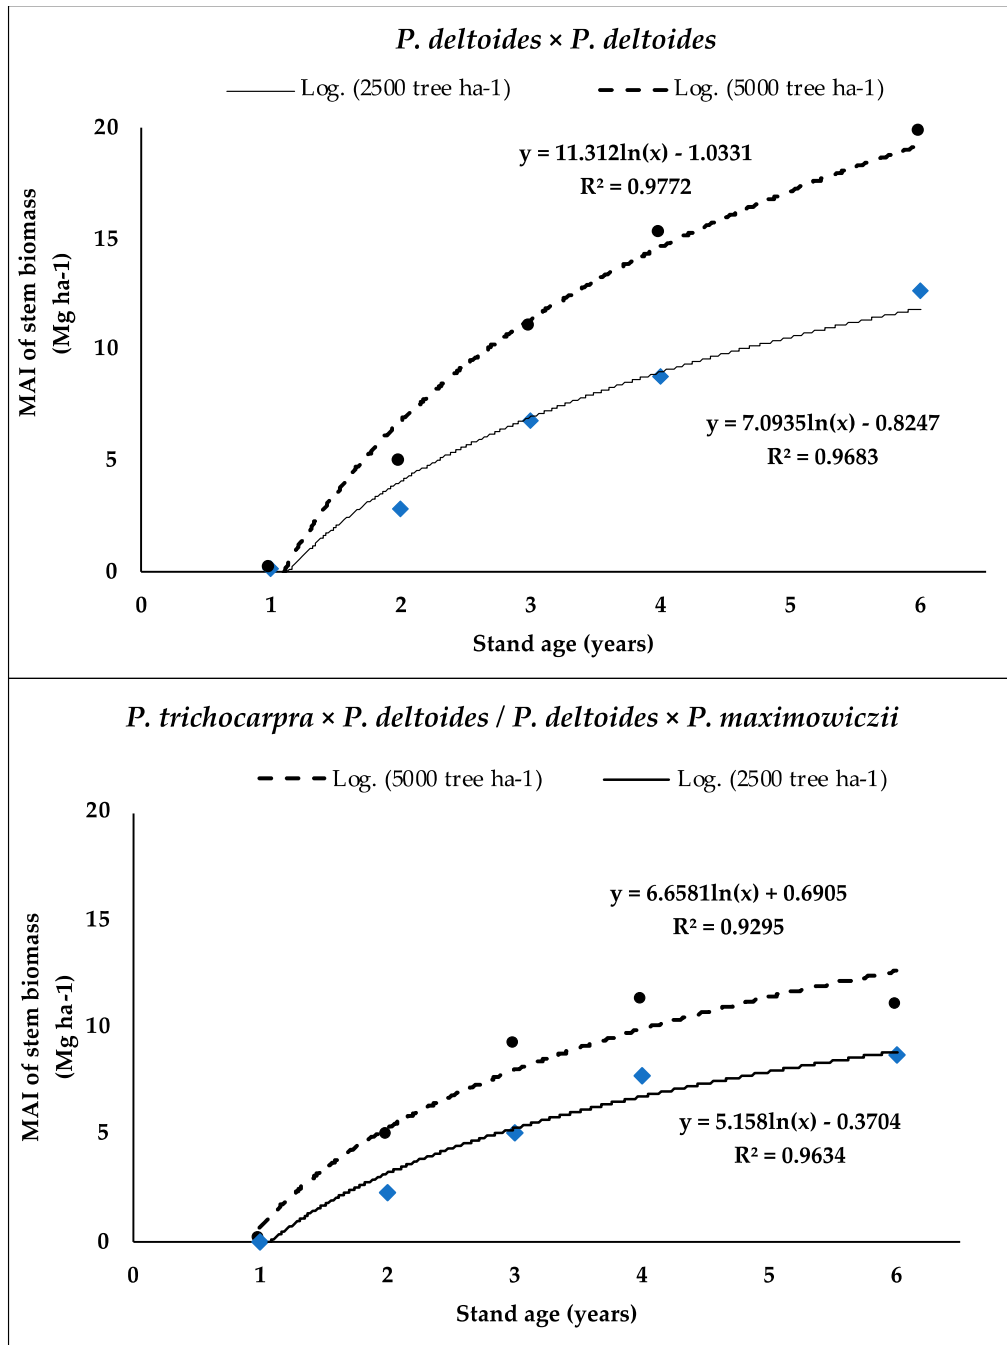

**Figure S1.** Mean annual increment (MAI, Mg ha<sup>-1</sup>) of green stem biomass versus stand age at Clinton A and Clinton B (in the Coastal region of North Carolina, USA) during the first six years of growth

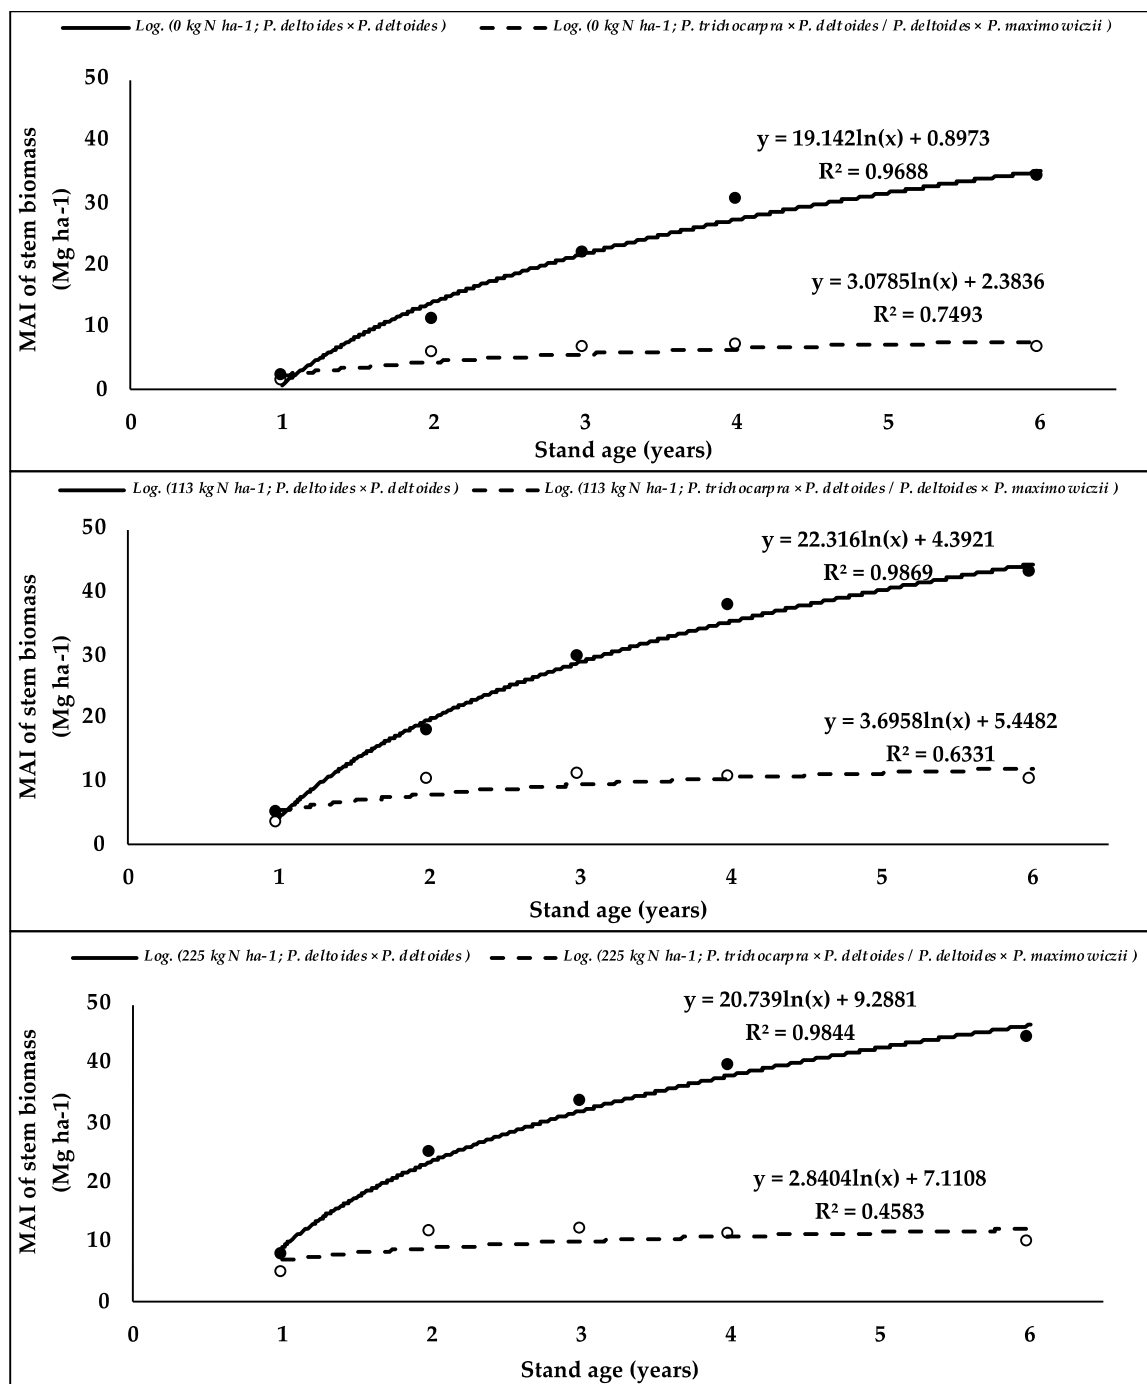

**Figure S2.** Mean annual increment (MAI, Mg ha<sup>-1</sup>) of green stem biomass versus stand age at Williamsdale site in North Carolina, during the first six years of growth

## Supplementary Tables

**Table S1.** Results of analyses of variance for stem biomass (green) of poplar clones established at two stand densities with three fertilization rates at Clinton A, Clinton B, and Williamsdale (in the Coastal region of North Carolina, USA) after six years of growth ( $\alpha = 0.05$ ).

| Effect                                 | DF | Clinton A      |                | Clinton B      |                | Williamsdale   |                |
|----------------------------------------|----|----------------|----------------|----------------|----------------|----------------|----------------|
|                                        |    | <i>F Value</i> | <i>P value</i> | <i>F Value</i> | <i>P value</i> | <i>F Value</i> | <i>P value</i> |
| Stand Density                          | 1  | 8.53           | 0.0054         | 12.35          | 0.001          | 7.73           | 0.0083         |
| Fertilization Rate                     | 2  | 1.85           | 0.1689         | 0.69           | 0.5061         | 10.09          | 0.0003         |
| Clone                                  | 3  | 12.97          | <.0001         | 10.11          | <.0001         | 55.63          | <.0001         |
| Stand Density*Fertilization Rate       | 2  | 1.69           | 0.1962         | 1.37           | 0.265          | 0.48           | 0.6253         |
| Stand Density*Clone                    | 3  | 0.61           | 0.6096         | 1.07           | 0.3698         | 3.24           | 0.0322         |
| Fertilization Rate*Clone               | 6  | 0.61           | 0.7249         | 0.24           | 0.9607         | 2.06           | 0.0799         |
| Stand Density*Fertilization Rate*Clone | 6  | 0.34           | 0.9131         | 1.33           | 0.2639         | 3.35           | 0.0093         |

*P* values lower than  $\alpha = 0.05$  are significant

**Table S2.** Results of analyses of variance for site effects and interaction on stem biomass (green) of poplar clones established at two stand densities with three fertilization rates at Clinton A, Clinton B, and Williamsdale (in the Coastal region of North Carolina, USA) after six years of growth ( $\alpha = 0.05$ ).

| Effect                                   | DF | <i>F Value</i> | <i>P value</i> |
|------------------------------------------|----|----------------|----------------|
| Site                                     | 1  | 2.39           | 0.1254         |
| Site*Stand density                       | 3  | 0.03           | 0.8577         |
| Site*Fertilizer Rate                     | 1  | 0.38           | 0.6821         |
| Site*Clone                               | 3  | 0.57           | 0.6375         |
| Site*Stand density*Clone                 | 2  | 0.66           | 0.5775         |
| Site*Fertilizer Rate*Clone               | 6  | 0.48           | 0.8182         |
| Site*Stand density*Fertilizer Rate       | 2  | 2.06           | 0.1332         |
| Site*Stand density*Fertilizer Rate*Clone | 6  | 0.95           | 0.4624         |

*P* values lower than  $\alpha = 0.05$  are significant

**Table S3.** Results of analyses of variance for LAI of poplar clones during the second year of growth. The stands were established at two stand densities with three fertilization rates at three sites in the Coastal region of North Carolina, USA (Clinton A, Clinton B, and Williamsdale;  $\alpha = 0.05$ ).

| Effect                            | DF | Type III SS | Mean Square | F Value | P value <sup>a</sup> |
|-----------------------------------|----|-------------|-------------|---------|----------------------|
| Site                              | 2  | 29.50       | 14.75       | 65.93   | <.0001               |
| Stand Density                     | 1  | 2.38        | 2.16        | 10.65   | 0.0012               |
| Site*Stand Density                | 2  | 7.24        | 3.62        | 16.18   | <.0001               |
| Clone                             | 3  | 28.24       | 9.41        | 42.07   | <.0001               |
| Site*Clone                        | 6  | 12.99       | 2.16        | 9.68    | <.0001               |
| Stand Density*Clone               | 3  | 2.10        | 0.70        | 3.14    | 0.0248               |
| Site*Stand Density*Clone          | 6  | 0.74        | 0.12        | 0.55    | 0.7678               |
| Fertilization                     | 2  | 38.98       | 19.49       | 87.11   | <.0001               |
| Site*Fertilization                | 4  | 7.26        | 1.81        | 8.12    | <.0001               |
| Stand Density*Fertilization       | 2  | 1.54        | 0.77        | 3.44    | 0.0325               |
| Site* Stand Density*Fertilization | 4  | 20.79       | 5.19        | 23.23   | <.0001               |
| Fertilization*Clone               | 6  | 2.23        | 0.37        | 1.67    | 0.1265               |
| Site*Fertilization*Clone          | 12 | 2.05        | 0.17        | 0.77    | 0.6868               |
| Stand Density*Fertilization*Clone | 6  | 0.37        | 0.06        | 0.28    | 0.9461               |
| Site*Density*Fertilization*Clone  | 12 | 4.95        | 0.41        | 1.85    | 0.0379               |

<sup>a</sup> P values lower than  $\alpha = 0.05$  are significant

**Table S4.** Results of analyses of variance for foliar nitrogen (%) of poplar clones during the second year of growth. The stands were established at two stand densities with three fertilization rates at three sites in the Coastal region of North Carolina, USA (Clinton A, Clinton B, and Williamsdale;  $\alpha = 0.05$ ).

| Effect                            | DF | Type III SS | Mean Square | F Value | P value <sup>a</sup> |
|-----------------------------------|----|-------------|-------------|---------|----------------------|
| Site                              | 2  | 9.66        | 4.83        | 103.13  | <.0001               |
| Stand Density                     | 1  | 0.02        | 0.02        | 0.59    | 0.4443               |
| Site*Stand Density                | 2  | 0.70        | 0.35        | 7.55    | 0.0006               |
| Clone                             | 3  | 3.13        | 1.04        | 22.26   | <.0001               |
| Site*Clone                        | 6  | 1.05        | 0.17        | 3.77    | 0.0011               |
| Stand Density*Clone               | 3  | 0.67        | 0.22        | 4.77    | 0.0027               |
| Site*Stand Density*Clone          | 6  | 0.60        | 0.10        | 2.16    | 0.0453               |
| Fertilization                     | 2  | 0.31        | 0.15        | 3.38    | 0.0347               |
| Site*Fertilization                | 4  | 1.71        | 0.42        | 9.16    | <.0001               |
| Stand Density*Fertilization       | 2  | 1.67        | 0.83        | 17.87   | <.0001               |
| Site* Stand Density*Fertilization | 4  | 3.08        | 0.77        | 16.46   | <.0001               |
| Fertilization*Clone               | 6  | 1.09        | 0.18        | 3.90    | 0.0008               |
| Site*Fertilization*Clone          | 12 | 1.04        | 0.08        | 1.86    | 0.0364               |
| Stand Density*Fertilization*Clone | 6  | 0.69        | 0.11        | 2.47    | 0.0227               |
| Site* Density*Fertilization*Clone | 12 | 1.53        | 0.12        | 2.72    | 0.0013               |

<sup>a</sup> P values lower than  $\alpha = 0.05$  are significant

**Table S5.** Results of analyses of variance for *Melampsora* (rust) presence on poplar clones during the second year of growth. The stands were established at two stand densities with three fertilization rates at three sites in the Coastal region of North Carolina, USA ( $\alpha = 0.05$ ).

| Effect                            | DF | Type III SS | Mean Square | F Value | P value <sup>a</sup> |
|-----------------------------------|----|-------------|-------------|---------|----------------------|
| Site                              | 2  | 66.06       | 33.03       | 224.86  | <.0001               |
| Stand Density                     | 1  | 0.02        | 0.02        | 0.14    | 0.7090               |
| Site*Stand Density                | 2  | 0.64        | 0.32        | 2.19    | 0.1123               |
| Clone                             | 3  | 2.00        | 0.66        | 4.55    | 0.0036               |
| Site*Clone                        | 6  | 0.85        | 0.14        | 0.97    | 0.4468               |
| Stand Density*Clone               | 3  | 2.46        | 0.82        | 5.59    | 0.0009               |
| Site*Stand Density*Clone          | 6  | 1.54        | 0.25        | 1.75    | 0.1066               |
| Fertilization                     | 2  | 0.47        | 0.23        | 1.62    | 0.1994               |
| Site*Fertilization                | 4  | 0.86        | 0.21        | 1.47    | 0.2091               |
| Stand Density*Fertilization       | 2  | 0.71        | 0.35        | 2.44    | 0.0883               |
| Site* Stand Density*Fertilization | 4  | 1.35        | 0.33        | 2.31    | 0.0566               |
| Fertilization*Clone               | 6  | 1.26        | 0.21        | 1.44    | 0.1977               |
| Site*Fertilization*Clone          | 12 | 3.26        | 0.27        | 1.85    | 0.0372               |
| Stand Density*Fertilization*Clone | 6  | 0.64        | 0.10        | 0.74    | 0.6201               |
| Site* Density*Fertilization*Clone | 12 | 3.06        | 0.25        | 1.74    | 0.0553               |

<sup>a</sup> P values lower than  $\alpha = 0.05$  are significant

**Table S6.** Results of analyses of variance for *Chrysomela scripta* Fabricius damage presence on poplar clones during the second year of growth. The stands were established at two stand densities with three fertilization rates at three sites in the Coastal region of North Carolina, USA ( $\alpha = 0.05$ ).

| Effect                             | DF | Type III SS | Mean Square | F Value | P value <sup>a</sup> |
|------------------------------------|----|-------------|-------------|---------|----------------------|
| Site                               | 2  | 0.42        | 0.21        | 0.99    | 0.3725               |
| Stand Density                      | 1  | 4.40        | 4.40        | 20.60   | <.0001               |
| Site*Stand Density                 | 2  | 2.22        | 1.11        | 5.22    | 0.0056               |
| Clone                              | 3  | 2.21        | 0.73        | 3.45    | 0.0163               |
| Site*Clone                         | 6  | 3.76        | 0.62        | 2.94    | 0.0077               |
| Stand Density*Clone                | 3  | 2.01        | 0.67        | 3.14    | 0.0248               |
| Site*Stand Density*Clone           | 6  | 8.97        | 1.49        | 7.00    | <.0001               |
| Fertilization                      | 2  | 3.90        | 1.95        | 9.14    | 0.0001               |
| Site*Fertilization                 | 4  | 1.72        | 0.43        | 2.02    | 0.0895               |
| Stand Density*Fertilization        | 2  | 1.10        | 0.55        | 2.59    | 0.0758               |
| Site* Stand Density*Fertilization  | 4  | 1.35        | 0.33        | 1.59    | 0.1761               |
| Fertilization*Clone                | 6  | 2.99        | 0.49        | 2.33    | 0.0308               |
| Site*Fertilization*Clone           | 12 | 1.96        | 0.16        | 0.77    | 0.6867               |
| Stand Density *Fertilization*Clone | 6  | 1.62        | 0.27        | 1.26    | 0.2719               |
| Site* Density*Fertilization*Clone  | 12 | 2.71        | 0.22        | 1.06    | 0.3939               |

<sup>a</sup> P values lower than  $\alpha = 0.05$  are significant

**Table S7.** Analysis results of stem biomass correlations with LAI, foliar N, *Melampsora spp. rust*, and *Chrysomela scripta* damage for poplars ( $\alpha = 0.05$ ). The poplar were two years old and established at two stand densities with three fertilization rates at three sites in the Coastal region of North Carolina, USA.

**Correlation between poplar LAI and green stem biomass**

| Source          | DF  | Sum of Squares     | Mean Square    | F Value | P value <sup>a</sup> |
|-----------------|-----|--------------------|----------------|---------|----------------------|
| Model           | 1   | 14,848             | 14,848         | 113.36  | <.0001               |
| Error           | 776 | 101,639            | 130            |         |                      |
| Corrected Total | 777 | 116,486            |                |         |                      |
| Variable        | DF  | Parameter Estimate | Standard Error | t Value | P value <sup>a</sup> |
| Intercept       | 1   | 0.12               | 1.11           | 0.11    | 0.9100               |
| Leaf Area Index | 1   | 6.84               | 0.64           | 10.652  | <.0001               |

<sup>a</sup> P values lower than  $\alpha = 0.05$  are significant;  $R^2 = 0.1275$

**Correlation between Foliar N of poplars and green stem biomass**

| Source          | DF  | Sum of Squares     | Mean Square    | F Value | P value <sup>a</sup> |
|-----------------|-----|--------------------|----------------|---------|----------------------|
| Model           | 1   | 12,095             | 12,095         | 89.91   | <.0001               |
| Error           | 776 | 104,391            | 134            |         |                      |
| Corrected Total | 777 | 116,486            |                |         |                      |
| Variable        | DF  | Parameter Estimate | Standard Error | t Value | P value <sup>a</sup> |
| Intercept       | 1   | -15.65             | 2.86           | -5.47   | <.0001               |
| Foliar N        | 1   | 14.24              | 1.50           | 9.48    | <.0001               |

<sup>a</sup> P values lower than  $\alpha = 0.05$  are significant;  $R^2 = 0.1038$

**Correlation between *Melampsora spp. Rust* and green stem biomass of poplars**

| Source                      | DF  | Sum of Squares     | Mean Square    | F Value | P value <sup>a</sup> |
|-----------------------------|-----|--------------------|----------------|---------|----------------------|
| Model                       | 1   | 10,325             | 10,325         | 75.47   | <.0001               |
| Error                       | 776 | 106,161            | 136            |         |                      |
| Corrected Total             | 777 | 116,486            |                |         |                      |
| Variable                    | DF  | Parameter Estimate | Standard Error | t Value | P value <sup>a</sup> |
| Intercept                   | 1   | 8.16               | 0.54           | 14.98   | <.0001               |
| <i>Melampsora spp. rust</i> | 1   | 7.41               | 0.85           | 8.69    | <.0001               |

<sup>a</sup> P values lower than  $\alpha = 0.05$  are significant;  $R^2 = 0.0886$ ;

**Correlation between *Chrysomela scripta* Fabricius damage and green stem biomass of poplar clones**

| Source                   | DF  | Sum of Squares     | Mean Square    | F Value | P value <sup>a</sup> |
|--------------------------|-----|--------------------|----------------|---------|----------------------|
| Model                    | 1   | 657                | 657            | 4.41    | 0.0361               |
| Error                    | 776 | 115,829            | 149            |         |                      |
| Corrected Total          | 777 | 116,486            |                |         |                      |
| Variable                 | DF  | Parameter Estimate | Standard Error | t Value | P value <sup>a</sup> |
| Intercept                | 1   | 10.37              | 0.58           | 17.67   | <.0001               |
| <i>C. scripta</i> Damage | 1   | 1.85               | 0.88           | 2.10    | 0.0361               |

<sup>a</sup> P values lower than  $\alpha = 0.05$  are significant;  $R^2 = 0.0056$
